# Supplementary material for: Computational Modeling Differentiates Learning Rate From Reward Sensitivity Deficits Produced by Early-Life Adversity in a Rodent Touchscreen Probabilistic Reward Task
Source: PubMed Central journal article supplement — Biol Psychiatry Glob Open Sci. 2024 Jul 20;4(6):100362. doi: 10.1016/j.bpsgos.2024.100362 (PMC11387686; doi:10.1016/j.bpsgos.2024.100362), 2024-07-20
Supplement: mmc2.pdf [file mmc2.pdf]

## SUPPLEMENTARY INFORMATION

### **Computational Modeling Differentiates Learning Rate From Reward Sensitivity Deficits Produced by Early-Life Adversity in a Rodent Touchscreen Probabilistic Reward Task**

Kangas *et al.*

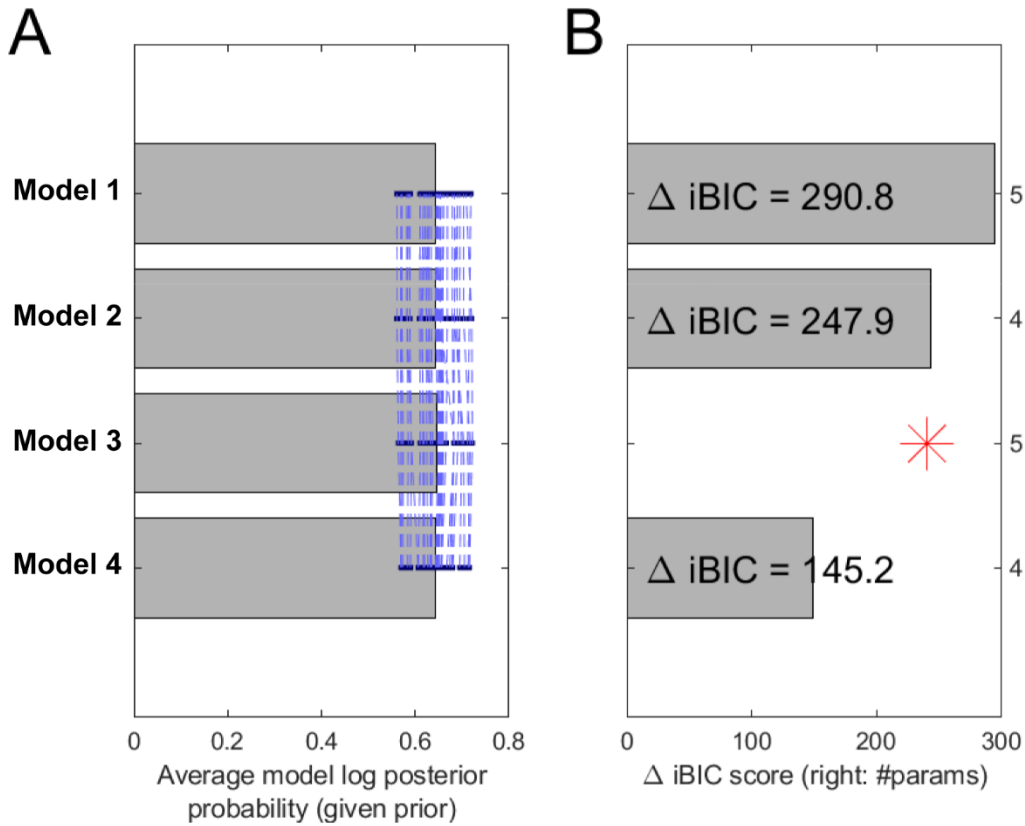

**Supplementary Figure 1.** Model 1: Stimulus-action Rescorla-Wagner model with separate sensitivities for reward and non-reward events; Model 2: Basic stimulus-action Rescorla-Wagner model; Model 3: Belief Model; Model 4: Action Only Model. In all 3 repeat runs, the Belief Model had the lowest iBIC and thus explained the data best. A difference  $\geq 10$  in iBIC scores between models is strong evidence for the model with the lower score.
